1 Eating behavior trajectories in the first ten years of life and their relationship with BMI

2

3 Dr Moritz Herle<sup>1,2</sup>, Prof Bianca De Stavola<sup>1</sup>, Christopher Hübel<sup>3,4,5</sup>, Dr Diana L Santos

4 Ferreira<sup>6,7</sup>, Mohamed Abdulkadir<sup>8</sup>, Dr Zeynep Yilmaz<sup>9</sup>, Prof Ruth Loos<sup>10</sup>, Dr Rachel Bryant-

5 Waugh<sup>1,11</sup>, Prof Cynthia M. Bulik<sup>5,9,12</sup> & Dr Nadia Micali<sup>1,8,12</sup>

6 <sup>1</sup> Great Ormond Street Institute of Child Health, University College London, London, UK

7 <sup>2</sup> Department of Biostatistics & Health Informatics, Institute of Psychiatry, Psychology &  
8 Neuroscience at King's College London, United Kingdom

9 <sup>3</sup> Social, Genetic & Developmental Psychiatry Centre, Institute of Psychiatry, Psychology &  
10 Neuroscience, King's College London, UK

11 <sup>4</sup> UK National Institute for Health Research (NIHR) Biomedical Research Centre for Mental  
12 Health, South London and Maudsley Hospital, London, UK

13 <sup>5</sup> Department of Medical Epidemiology and Biostatistics, Karolinska Institutet, Stockholm,  
14 Sweden

15 <sup>6</sup> Medical Research Council Integrative Epidemiology, University of Bristol, Bristol, UK

16 <sup>7</sup> Population Health Sciences, Bristol Medical School, University of Bristol, Bristol, UK

17 <sup>8</sup> Department of Psychiatry, Faculty of Medicine, University of Geneva, Geneva, Switzerland

18 <sup>9</sup> Department of Psychiatry, University of North Carolina at Chapel Hill, Chapel Hill, NC,  
19 USA

20 <sup>10</sup> Icahn Mount Sinai School of Medicine, New York, NY, USA

21 <sup>11</sup> Great Ormond Street Hospital, London, UK

22 <sup>12</sup> Department of Nutrition, University of North Carolina at Chapel Hill, Chapel Hill, NC,  
23 USA

24 <sup>12</sup> Child and Adolescent Psychiatry Division, Department of Child and Adolescent Health,  
25 Geneva University Hospital, Geneva, Switzerland

26 Names for PubMed Index: Herle, De Stavola, Hübel, Santos Ferreira, Abdulkadir, Yilmaz,  
27 Loos, Bryant-Waugh, Bulik, Micali

28 Corresponding author:

29 Dr Nadia Micali MD, MRCPsych, PhD, FAED

30 Senior Lecturer and Honorary Consultant Psychiatrist

31 Child and Adolescent Mental Health, Palliative Care and Paediatrics Section

32 Population, Policy and Practice Research Theme

33 UCL Institute of Child Health

34 30 Guilford Street

35 London WC1N 1EH

36 Tel: 020 7905 2163  
37 Fax: 020 7831 7050  
38 e-mail: n.micali@ucl.ac.uk

39 Running title: Patterns of child eating behaviors and later BMI

40 Sources of support: This work was specifically funded by the UK Medical Research Council  
41 and the Medical Research Foundation (ref: MR/R004803/1).

42 Financial Disclosure: Bulik reports: Shire (grant recipient, Scientific Advisory Board  
43 member) and Pearson and Walker (author, royalty recipient).

44 Abbreviations: Eating behaviors: EB, Body Mass Index: BMI, Avon Longitudinal Study of  
45 Parents and Children: ALSPAC, Latent Class Growth Trajectories: LCGA,  
46 Avoidant/restrictive food intake disorder: ARFID

47

48

49

50

51

52

53

54

55

56

57

58

59

60

61 **Abstract**

62 **Background:** Child eating behaviors are highly heterogeneous and their longitudinal impact  
63 on childhood weight is unclear. The objective of this study was to characterize eating  
64 behaviors during the first ten years of life and evaluate associations with BMI at age 11 years.

65 **Method:** Data were parental reports of eating behaviors from 15 months to age 10 years  
66 (n=12,048) and standardized body mass index (zBMI) at age 11 years (n=4884) from the  
67 Avon Longitudinal Study of Parents and Children. Latent class growth analysis was used to  
68 derive latent classes of over-, under-, and fussy eating. Linear regression models for zBMI at  
69 11 years on each set of classes were fitted to assess associations with eating behavior  
70 trajectories.

71 **Results:** We identified four classes of overeating; “low stable” (70%), “low transient” (15%),  
72 “late increasing” (11%), and “early increasing” (6%). The “early increasing” class was  
73 associated with higher zBMI (boys:  $\beta=0.83$ , 95%CI:0.65, 1.02; girls:  $\beta=1.1$ ; 0.92, 1.28)  
74 compared to “low stable”. Six classes were found for undereating; “low stable” (25%), “low  
75 transient” (37%), “low decreasing” (21%), “high transient” (11%), “high decreasing” (4%),  
76 and “high stable” (2%). The latter was associated with lower zBMI (boys:  $\beta=-0.79$ ; -1.15, -  
77 0.42; girls:  $\beta=-0.76$ ; -1.06, -0.45). Six classes were found for fussy eating; “low stable”  
78 (23%), “low transient” (15%), “low increasing” (28%), “high decreasing” (14%), “low  
79 increasing” (13%), “high stable” (8%). The “high stable” class was associated with lower  
80 zBMI (boys:  $\beta =-0.49$ ; -0.68 -0.30; girls:  $\beta =-0.35$ ; -0.52, -0.18).

81 **Conclusions:** Early increasing overeating during childhood is associated with higher zBMI at  
82 age 11. High persistent levels of undereating and fussy eating are associated with lower  
83 zBMI. Longitudinal trajectories of eating behaviors may help identify children potentially at  
84 risk of adverse weight outcomes.

## 85 **Introduction**

86 Child eating behaviors have received attention, especially due to their potential association  
87 with weight. However, previous cross-sectional and a limited number of longitudinal studies  
88 produced inconsistent findings. Previous research has suggested that some eating behaviors  
89 are stable across childhood, as indicated by moderate correlations between eating behaviors  
90 at age 4 and 10 in English (1) and Dutch samples (2), as well as in younger children, between  
91 two and five years (3). However, these studies only had access to two data points, precluding  
92 a comprehensive examination stability and change. Some eating behaviors, such as fussy  
93 eating, which is the tendency to eat only certain foods and to refuse to try new foods, are  
94 common and potentially more transient (1). A previous study reported that one third of  
95 children exhibit some fussiness during the first four years of life, but many tend to remit by  
96 age six with about 4% being persistently fussy.(5) More recently, a study of the same cohort  
97 as discussed in this paper, the Avon Longitudinal Study of Parents and Children, found that  
98 mothers indicated that more than half of the children at 15 months were fussy about what  
99 foods to eat.(2)

100 Cross-sectional studies (3-5) have primarily suggested that eating behaviors, such as  
101 responsiveness to external food cues or emotional overeating are associated with higher child  
102 weight. Other eating behaviors, such as fussy eating and responsiveness to internal satiety  
103 cues are associated with lower weight (6-8). However, other cross-sectional studies have not  
104 replicated these findings (9, 10). Longitudinally, eating behaviors measured at 5-6 years are  
105 weakly associated with body mass index (BMI) at about 6-8 years (11) . In earlier ages,  
106 between 3 months and 9-15 months, a bidirectional association between child eating and  
107 weight has been reported.(12) More recently, the bidirectional association between child  
108 eating and later BMI was replicated in a sample of Norwegian children, aged 4 to 8 years(13).  
109 Furthermore, children who display fussy eating appear to be at higher risk for developing

110 underweight in childhood, but may be at increased risk for later overweight(14, 15) .  
111 However, some studies report no or only weak longitudinal relationships (16-18).  
112 Overall, childhood eating behaviors and childhood weight outcomes and the longitudinal  
113 development of child eating behaviors remains poorly understood. Longitudinal studies often  
114 focus on overall mean scores, ignoring heterogeneity and transience of child eating behaviors.  
115 We, therefore, aimed to investigate repeatedly measured eating behaviors in a large  
116 population-based birth cohort using latent class modeling to identify longitudinal trajectories  
117 during the first ten years of life. Furthermore, we examined their relationship with age- and  
118 sex-standardized zBMI at age 11. This age was selected as the outcome measures, due to the  
119 proximity to the derived trajectories and to ensure the largest and most representative sample  
120 of prepubertal children. Our hypothesis was that persistent EB patterns in childhood would be  
121 more strongly associated with child zBMI than transient ones.

## 122 **Methods**

### 123 **Participants**

124 Data from the Avon Longitudinal Study of Parents and Children (ALSPAC), a population  
125 based, longitudinal cohort of mothers and their children born in the southwest of England (19,  
126 20) were analyzed. All pregnant women expected to have children between the 1<sup>st</sup> April 1991  
127 and 31<sup>st</sup> December 1992 were invited to enroll in the study, providing informed written  
128 consent. From all pregnancies (n = 14,676), 14,451 mothers opted to take part; by one year  
129 13,988 children were alive. When the oldest children were approximately 7 years of age, an  
130 attempt was made to bolster the initial sample with eligible cases who had failed to join the  
131 study originally (referred to as Phase 2), however these participants were not included in  
132 these analyses. The phases of enrolment are described in more detail in the cohort profile

133 papers (19, 20). One sibling per set of multiple births, was randomly excluded from these  
134 analyses to guarantee independence of participants.

### 135 *Eating behaviors*

136 Repeated measures of parent-reported child eating behaviors were available at a maximum of  
137 eight time points around the age of 15, 24, 38, 54, 62, 81, 105, and 116 months. Parents were  
138 asked if they were worried about their child overeating (“How worried are you because your  
139 child is overeating”), and undereating (“How worried are you because your child is  
140 undereating”). The remaining questions probed the child’s tendency to be fussy (“How  
141 worried are you because your child is choosy”, “How worried are you because your child has  
142 feeding difficulties”, “How worried are you because your child is refusing food”). Parents  
143 were given the following response options: “no/did not happen”, “not worried”, “a bit  
144 worried” and “greatly worry”. The two top categories (“a bit worried” and “greatly worry”)  
145 were combined to avoid very low frequencies. Children who had at least one measure of any  
146 of the items were included in the analyses (N=12,048). About half (45%) of the included  
147 children had data on all 8 time points and ~85% had data at least 3 time points.

### 148 *Anthropometric data*

149 Weight and height were measured during clinic visits when the children (N = 4,885) were 11  
150 years old (mean=128.6 months, SD=1.64). Height was measured to the nearest millimeter  
151 with the use of a Harpenden Stadiometer (Holtain Ltd.). Weight was measured with a Tanita  
152 Body Fat Analyzer (Tanita TBF UK Ltd.) to the nearest 50g. BMI was calculated by dividing  
153 weight (in kg) by height squared (in m). Age- and sex-standardized BMI z-scores (zBMI)  
154 were calculated according to UK reference data, indicating the degree to which a child is  
155 heavier (>0) or lighter (<0) than expected according to his/her age and sex(21). We aimed to  
156 relate the trajectories of eating behaviors with zBMI at age 11 years. Children with data on

157 both eating behavior and zBMI were included in the final stage of the analyses (N=4,884). A  
158 comparison of the distribution of derived trajectories between participants with and without  
159 BMI data at 11 years can be found in eTable 5.

#### 160 *Covariates*

161 The following indicators of socioeconomic status of the family were used: Maternal age at  
162 birth (years) and maternal education status (A-Levels or higher, lower than A-Levels) and  
163 parental occupational status (manual, non-manual labor of the highest earner in the family).  
164 Further birthweight (grams) and gestational age at birth (weeks) of the children were also  
165 used. The indicators of socioeconomic status were treated as potential confounders for the  
166 analyses of zBMI and as predictors of missing data for parent-reported EB data. Details of all  
167 data are available through a fully searchable data dictionary at  
168 [www.bristol.ac.uk/alspac/researchers/our-data](http://www.bristol.ac.uk/alspac/researchers/our-data).

#### 169 **Statistical analyses**

170 Analyses were conducted from October 2017 to May 2018 and included two stages in line  
171 with the classify-analyze framework (22).

172 First, Latent Class Growth Analysis (LCGA) was used to identify subgroups (“latent  
173 classes”) of children who share the same trajectories of eating behaviors (23). In comparison  
174 to Growth Mixture Modelling, an alternative approach to identifying these latent classes,  
175 LCGA constrains the variation within each class to zero, reducing the number of parameters  
176 and simplifying model estimation (23). LCGA was conducted using Full Information  
177 Maximum Likelihood (FIML) (24), incorporating indicators of social class (maternal age,  
178 maternal education, and manual or non-manual labor of the highest earner in the family) as  
179 auxiliary variables to account for the missingness (including attrition) affecting the  
180 longitudinal data, as previously described in ALSPAC (19). FIML assumes data are missing

181 at random (MAR), once these auxiliary variables are accounted for and therefore children  
182 with at least one measure of eating behavior at any time point. Analyses were stratified by  
183 sex to examine possible effect modification. Stratified results were compared against  
184 unstratified using combined data using Likelihood Ratio Tests. As the number of classes is  
185 not directly estimated, alternative specifications with increasing number of assumed classes  
186 were compared using the following model fit indicators: Akaike Information Criterion (AIC),  
187 Bayesian Information Criterion (BIC), adjusted Bayesian information Criterion (adj BIC),  
188 selecting the lowest values, and entropy, aiming for the highest. In addition to these model fit  
189 indicators, the class size and interpretability of the classes were taken into account as  
190 recommended by Muthén (24). After selection of the best number of classes, estimations  
191 were repeated using 1000 random starts to avoid local maxima.

192 In the second stage, participants were allocated to their most likely classes according to their  
193 posterior probabilities using the maximum-probability assignment rule (25). These predicted  
194 classes were then included as explanatory variables in regression analyses of zBMI scores at  
195 age 11, which also controlled for the following a priori confounders: maternal age,  
196 gestational age, birthweight, and maternal education at birth. Results are reported in terms of  
197 adjusted regression coefficients ( $\beta$ ) for each class in comparison to the first (reference) class.  
198 Since not all children with eating behavior data had data on zBMI, because of attrition  
199 affecting later ages, the characteristics of study participants with/without zBMI were  
200 compared in order to assess their representativeness of the original study membership (eTable  
201 5). LCGA was conducted in MPlus Version 8 (26). Regression analyses were conducted in  
202 Stata 15 (27). All code is available at [https://github.com/MoritzHerle/Patterns-of-child-](https://github.com/MoritzHerle/Patterns-of-child-eating-behaviors-and-later-BMI)  
203 [eating-behaviors-and-later-BMI](https://github.com/MoritzHerle/Patterns-of-child-eating-behaviors-and-later-BMI).

204 *Ethical approval*



205 Ethical approval for the study was obtained from the ALSPAC Ethics and Law Committee  
206 and the Local Research Ethics Committees. All procedures were performed in accordance  
207 with the ethical standards laid down in the 1964 Declaration of Helsinki and its later  
208 amendments.

## 209 **Results**

210 Summary statistics of the study population at baseline are listed in Table 1. Eating behaviors  
211 varied at the different time points (Figure 1). Overeating was uncommon, with the majority of  
212 parents reporting that their children never engaged in this behavior (77-85% across the 8 time  
213 points). Being fussy about food was the most common child behavior, especially at 54  
214 months, when a fifth of the children were described as fussy to a worrying extent.

215 [TABLE 1 here](#)

216 [FIGURE 1 here](#)

## 217 **Eating behavior classes**

218 Comparisons of alternative number of classes for the three LGCA models identified four  
219 classes for the overeating longitudinal data, and six classes each for undereating and fussy  
220 eating according to our pre-specified criteria (eTable 1a-c). Overall, separate models for boys  
221 and girls fit the data better than when analyzed jointly (eTable 2).

222 Most children were assigned to the “low stable” class of overeating, marked by the absence  
223 of high levels of overeating across time points. Undereating was more heterogeneous; the  
224 most common class was “low transient”, characterized by low levels of undereating, which  
225 attenuated completely by age 10. Similarly, the most common class for fussy eating was the  
226 “low transient” group, with increasing numbers of parents reporting fussy eating from 15

227 months onwards, which decreases again after 62 months. Figure 2a-c illustrates the class  
228 trajectories for overeating, undereating, and fussy eating.

229 When comparing maternal and gestational age at birth, birthweight, and maternal education  
230 across classes we found that, for overeating, boys and girls in the “early increasing“ class had  
231 a higher mean birthweight than those in the “low stable” class; eTable 3). Children in the  
232 “high stable” class of undereating and fussy eating had a lower mean birthweight than their  
233 respective “low stable” classes. In addition, the percentage of mothers with A-Levels or  
234 university degree was lower in the “low stable” class of fussy eating compared to the “high  
235 stable”. Child zBMI scores per eating behavior class ranged widely within all classes  
236 (eFigure 1a-b).

237 FIGURES 2A -2C HERE

### 238 *Sensitivity analyses*

239 Not all children included in LCGA had zBMI data at 11 years. Trajectory frequencies derived  
240 from all participants were compared to the frequencies among the children who had complete  
241 BMI data at 11 years. Trajectory sizes and distributions were similar (eTable 5).

### 242 **Association between eating behaviors and zBMI at age 11**

#### 243 *Overeating*

244 In comparison to children who were reported to never overeat to a worrying extent (“low  
245 stable”), all other classes were positively associated with greater zBMI at the later age of 11  
246 years: “low transient” (boys: coefficient  $\beta=0.26$ , 95%CI:0.13, 0.39; girls:  $\beta=0.32$ , 95%CI:  
247 0.19, 0.44), “late increasing” (boys:  $\beta = 0.94$ , 95%CI: 0.8, 1.09; girls:  $\beta=0.94$ , 95%CI: 0.82,  
248 1.07) and “early increasing” (boys:  $\beta=0.83$ , 95%CI: 0.65, 1.02; girls:  $\beta=1.1$ , 95%CI: 0.92,  
249 1.28; Table 2).

250 *Undereating*

251 In contrast, undereating classes were associated with lower zBMI. The magnitude of  
252 associations in the “high transient” (boys:  $\beta=-0.25$ , 95%CI:-0.41, -0.08; girls:  $\beta=-0.24$ ,  
253 95%CI:-0.38, -0.09) and “high decreasing” (boys:  $\beta=-0.27$ , 95%CI:-0.5, -0.05; girls:  $\beta=-0.21$ ,  
254 95%CI:-0.45, 0.03) classes were similar. “Stable high” undereating was most strongly  
255 associated with lower zBMI (boys:  $\beta=-0.79$ , 95%CI:-1.15, -0.42; girls:  $\beta=-0.76$ , -1.06, -0.45;  
256 Table 2).

257 *Fussy Eating*

258 Similarly, fussy eating was associated with lower zBMI, for both boys and girls. “Stable  
259 high” fussy eating was most strongly and negatively associated with zBMI (boys:  $\beta=-0.49$ ,  
260 95%CI: -0.68, -0.30; girls:  $\beta=-0.35$ , -0.52, -0.18; Table 2). In contrast to boys, amongst girls  
261 “low transient” and “low increasing” fussy eating were not associated with zBMI at 11 years.  
262 Interactions between class and sex in their effects on zBMI at 11 were not supported for any  
263 of the Eating behaviors. Results from unadjusted regression models are available in eTable  
264 6a-c.

265 TABLE 2 HERE

266

267

268

269

270

271

272 **Discussion**

273 In this study, differential developmental patterns in eating behaviors across childhood were  
274 identified and found to be associated with later child zBMI. This is the first study to address  
275 this question, by establishing longitudinal trajectories of eating behaviors during the first ten  
276 years of childhood and investigating their association with childhood zBMI at age 11. Results  
277 suggested four different trajectories of overeating and six trajectories each for undereating  
278 and fussy eating, respectively. Overall, it is notable that the three eating behaviors follow  
279 markedly different developmental trajectories. Overeating was found to be generally low, but  
280 increased with time, whereas under und fussy eating varied substantially across the observed  
281 timeframe. Previous research, on smaller datasets with a lower number of eating behaviors  
282 measures have indicated similar patterns of change and stability (18, 28, 29). These  
283 differences might be explained by various complex environmental and biological factors.  
284 With age, children gain autonomy and have more meals outside the home, which might be  
285 associated with the general increase of overeating. On the other hand, in toddlerhood, parents  
286 might introduce various and different textures and flavors of foods to their children (30),  
287 which they might readily embrace or resist, potentially explaining this early increase in fussy  
288 eating.

289 The majority of children were not described as overeaters by their parents. However, two  
290 trajectories (16% of children) were marked by gradual increases in overeating and showed  
291 similar positive associations with child zBMI at age 11. Recent longitudinal analysis of  
292 dietary data in a UK child cohort highlighted that eating larger portions a few times per week  
293 accelerates early childhood growth (31). This tendency to overeat is likely to result in larger  
294 portion sizes, which have been suggested to have enduring effects on child weight (32, 33).  
295 Of note, is the possible perpetual bi-directional association between overeating and portion  
296 size, where one potentially influences the other.

297 In contrast to overeating, undereating was more common and more heterogeneous. By 15  
298 months, parents reported that children engaged in various levels of undereating, with about  
299 10% of boys and girls reported to undereat at a worrying level. However, undereating  
300 behavior of most children attenuated with time, indicating that parent-perceived undereating  
301 in children under the age of two years may represent a normal pattern of development. Only  
302 2-3% of children engaged in persistent high levels of undereating. This persistent pattern of  
303 undereating was negatively associated with child zBMI at age 11. Parental reports of  
304 undereating might be an indication of satiety sensitivity (34). Previous research has suggested  
305 that children who were attuned to their internal satiety cues ate smaller portions (35), and  
306 grew at a slower rate than their less satiety-responsive siblings (36).

307 Similarly to undereating, fussy eating behavior was highly heterogeneous in early life. Using  
308 LCGA, we identified a small but substantial group of children (8%) who were persistently  
309 fussy throughout the first ten years of life. These results add to previous studies suggesting  
310 that some fussiness around food is common during childhood, with one third of children  
311 reported to be fussy at some point, but only a small percentage of children remaining highly  
312 fussy eaters across development (37). More persistent fussy eating trajectories were  
313 negatively associated with child zBMI at age 11.

314 The relationship between food fussiness and weight is complex as fussy children might  
315 undereat certain food groups (e.g., fruits and vegetables) but overeat others (e.g.,  
316 carbohydrates and fats). Previous cross-sectional studies proposed that fussy children ate  
317 fewer vegetables and less fish, but consumed more savory and sweet snack foods at 14  
318 months (38). However, a longitudinal study indicated that persistent fussy eating in childhood  
319 was associated with higher prevalence of underweight in children aged six years (15).

320 This study supports the prospective association between eating behaviors and weight in  
321 children. Individual differences in weight have consistently been shown to be influenced by  
322 genetic factors (39). The behavioral susceptibility to obesity theory (40) suggests that eating  
323 behaviors might act as a mediator between genetic risk for obesity and exposure to the  
324 current obesogenic environment. Previous studies proposed that increased genetic risk for  
325 obesity is associated with decreased responsiveness to satiety cues, as well as greater  
326 responsiveness to external food cues in ten year old twins (41). Subsequent research has  
327 replicated these findings in Finnish (42), UK (43) and Canadian adults (44). However,  
328 previous studies only included single measures of eating behaviors and it remains unknown  
329 how genetic risk for obesity influences longitudinal trajectories of eating behaviors across  
330 development.

331 Apart from weight, eating behaviors have been implicated in diet quality and as potential risk  
332 factor for eating disorders. Especially, food fussiness has been associated with poor diet  
333 quality,(45) such as low consumption of vegetables (46). Food fussiness has received  
334 attention in the context of avoidant/restrictive food intake disorder (ARFID) (47). ARFID is a  
335 recently defined diagnosis and little is known about its onset, development, and effect on  
336 health and is characterized by extreme food fussiness affecting growth, weight, and physical  
337 health (48) and that a large proportion of adolescents diagnosed with ARFID were persistent  
338 fussy eaters during childhood (49). More research examining the impact of early food  
339 fussiness and undereating on feeding and eating disorders risk is needed. It is possible that the  
340 persistent fussy and undereating associated with low zBMI in this study may be ARFID  
341 presentations, or risk factors for other eating disorders marked by restrictive eating, such as  
342 anorexia nervosa. Further, child food fussiness has been found to be moderately heritable  
343 (50) and future research is needed to uncover its genetic basis, as well as the role of fussy  
344 eating in neurodevelopmental disorders such as autism spectrum disorder. In addition, the

345 majority of the research in this field relies on parental report. Parental anxiety could influence  
346 parents' perception and reporting of their child's eating behavior.(51)

### 347 **Strengths and Limitations**

348 To our knowledge, this is the most comprehensive longitudinal study of child eating  
349 behaviors in a large sample. Data were from a population-based cohort and person-centered  
350 statistical analyses allowed us to clarify the heterogeneity of eating behaviors. Height and  
351 weight were objectively measured during clinic visits. However, measures of eating  
352 behaviors were parent reported and subject to reporting bias. For example parents might be  
353 influenced by their own eating behaviors, their prior experiences with other children and  
354 might be observing their children more closely in early life. As children grow up and enter  
355 school, they will have an increasing numbers of meals outside the family home. Therefore  
356 parents might be less aware of their children's eating behaviors. However, relying on parental  
357 report remains the most commonly used measure of child eating behaviors, given that young  
358 children are not able to report their own behavior reliably, and standardized direct  
359 observational measures are costly and time-consuming, and would be infeasible for large  
360 cohorts such as ALSPAC. One additional limitation is the fact that undereating and  
361 overeating were only measured with one item at each wave, and a more comprehensive  
362 assessment of these eating behaviors would have been desirable. However, in the context of  
363 large-scale data collection efforts, such as ALSPAC, researchers always have to strike a  
364 balance between including the optimal number of items without overwhelming the  
365 participants. Further, the phrasing of the items only enquire how worried parents are about  
366 their children's' eating behavior, and not the frequency of the behaviors themselves. We  
367 implicitly assume that the greater the parental worry, the more pronounced the behavior. The  
368 results however refer to the reporting of the behavior, not the behavior per se. Overall,  
369 previous support for the use parental reports comes from research validating parent reported

370 child eating against behavioral measures of eating such as eating rate, energy intake at meal,  
371 eating without hunger and caloric compensation (35).

372 Additionally, analyzing the effect of estimated class membership on an outcome includes  
373 some degree of uncertainty. The values for entropy, which broadly reflects the level of  
374 correct classification, were lower for overeating and undereating than the desired 0.8,  
375 commonly used as cut-off point (51). Classes derived from LCGA are unobserved and hence  
376 class membership is inferred. We used maximum-probability assignment, which allocates  
377 each participant to the class they are most likely to belong to, carrying this class membership  
378 forward to further analyses. This method has been suggested to attenuate the effect of class  
379 on distal outcomes, due to uncertainty in class assignment (52). Hence, effect sizes estimated  
380 from the regression analyses may be conservative.

### 381 **Conclusions**

382 We identified four trajectories of overeating and six trajectories each of fussy and  
383 undereating in the ALSPAC sample, providing a thorough examination of child Eating  
384 behaviors. EB trajectories were differentially associated with child zBMI, with persistent  
385 behaviors having a stronger effect on BMI. Characterizing the heterogeneity of early life  
386 eating behaviors is an important component to understanding behavioral risk factors for  
387 common conditions, such as obesity.

### 388 **Acknowledgements:**

389 We are extremely grateful to all the families who took part in this study, the midwives for  
390 their help in recruiting them, and the whole ALSPAC team, which includes interviewers,  
391 computer and laboratory technicians, clerical workers, research scientists, volunteers,  
392 managers, receptionists and nurses.

### 393 **Funder:**



394 This work was supported by the UK Medical Research Council and the Medical Research  
395 Foundation (ref: MR/R004803/1).

396 The UK Medical Research Council and Wellcome (Grant ref: 102215/2/13/2) and the  
397 University of Bristol provide core support for ALSPAC. A comprehensive list of grants  
398 funding is available on the ALSPAC website  
399 (<http://www.bristol.ac.uk/alspac/external/documents/grant-acknowledgements.pdf> ).

400 Prof Bulik acknowledges funding from the Swedish Research Council (VR Dnr: 538-2013-  
401 8864).

402 The funders were not involved in the design or conduct of the study; collection, management,  
403 analysis, or interpretation of the data; or preparation, review, or approval of the manuscript.

404 **Potential conflict of interest:** Bulik reports: Shire (grant recipient, Scientific Advisory  
405 Board member) and Pearson and Walker (author, royalty recipient). All other authors have  
406 indicated they have no conflicts of interest to disclose.

407 **Author Contributions:**

408 MH, BDS, CB, RBW and NM designed the research; MH and BDS performed statistical  
409 analyses; all authors wrote and revised the manuscript for important intellectual content; NM  
410 had primary responsibility for final content. All authors read and approved the final  
411 manuscript.

412

413

414

415

## 416 **References**

417

- 418 1. Emmett PM, Hays NP, Taylor CM. Factors Associated with Maternal Worry about Her Young  
419 Child Exhibiting Choosy Feeding Behaviour. *Int J Env Res Pub He*. 2018;15(6).
- 420 2. Emmett PM, Hays NP, Taylor CM. Factors Associated with Maternal Worry about Her Young  
421 Child Exhibiting Choosy Feeding Behaviour. *Int J Environ Res Public Health*. 2018;15(6).
- 422 3. Braet C, Claus L, Goossens L, Moens E, Van Vlierberghe L, Soetens B. Differences in eating  
423 style between overweight and normal-weight youngsters. *J Health Psychol*. 2008;13(6):733-43.
- 424 4. Domoff SE, Miller AL, Kaciroti N, Lumeng JC. Validation of the Children's Eating Behaviour  
425 Questionnaire in a low-income preschool-aged sample in the United States. *Appetite*. 2015;95:415-  
426 20.
- 427 5. Hajna S, LeBlanc PJ, Faight BE, Merchant AT, Cairney J, Hay J, et al. Associations between  
428 family eating behaviours and body composition measures in peri-adolescents: Results from a  
429 community-based study of school-aged children. *Can J Public Health*. 2014;105(1):E15-E21.
- 430 6. Jansen PW, Roza SJ, Jaddoe VW, Mackenbach JD, Raat H, Hofman A, et al. Children's eating  
431 behavior, feeding practices of parents and weight problems in early childhood: results from the  
432 population-based Generation R Study. *The international journal of behavioral nutrition and physical*  
433 *activity*. 2012;9:130.
- 434 7. Webber L, Hill C, Saxton J, Van Jaarsveld CH, Wardle J. Eating behaviour and weight in  
435 children. *International journal of obesity*. 2009;33(1):21-8.
- 436 8. Sanchez U, Weisstaub G, Santos JL, Corvalan C, Uauy R. GOCS cohort: children's eating  
437 behavior scores and BMI. *Eur J Clin Nutr*. 2016.
- 438 9. Svensson V, Lundborg L, Cao Y, Nowicka P, Marcus C, Sobko T. Obesity related eating  
439 behaviour patterns in Swedish preschool children and association with age, gender, relative weight  
440 and parental weight--factorial validation of the Children's Eating Behaviour Questionnaire. *The*  
441 *international journal of behavioral nutrition and physical activity*. 2011;8:134.
- 442 10. Cao YT, Svensson V, Marcus C, Zhang J, Zhang JD, Sobko T. Eating behaviour patterns in  
443 Chinese children aged 12-18 months and association with relative weight--factorial validation of the  
444 Children's Eating Behaviour Questionnaire. *The international journal of behavioral nutrition and*  
445 *physical activity*. 2012;9:5.
- 446 11. Parkinson KN, Drewett RF, Le Couteur AS, Adamson AJ, T GMSC. Do maternal ratings of  
447 appetite in infants predict later Child Eating Behaviour Questionnaire scores and body mass index?  
448 *Appetite*. 2010;54(1):186-90.
- 449 12. van Jaarsveld CHM, Llewellyn CH, Johnson L, Wardle J. Prospective associations between  
450 appetitive traits and weight gain in infancy. *Am J Clin Nutr*. 2011;94(6):1562-7.
- 451 13. Steinsbekk S, Wichstrom L. Predictors of Change in BMI From the Age of 4 to 8. *Journal of*  
452 *pediatric psychology*. 2015.
- 453 14. Antoniou EE, Roefs A, Kremers SP, Jansen A, Gubbels JS, Sleddens EF, et al. Picky eating and  
454 child weight status development: a longitudinal study. *J Hum Nutr Diet*. 2016;29(3):298-307.
- 455 15. de Barse LM, Tiemeier H, Leermakers ET, Voortman T, Jaddoe VW, Edelson LR, et al.  
456 Longitudinal association between preschool fussy eating and body composition at 6 years of age:  
457 The Generation R Study. *The international journal of behavioral nutrition and physical activity*.  
458 2015;12:153.
- 459 16. Mallan KM, Fildes A, Magarey AM, Daniels LA. The Relationship between Number of Fruits,  
460 Vegetables, and Noncore Foods Tried at Age 14 Months and Food Preferences, Dietary Intake  
461 Patterns, Fussy Eating Behavior, and Weight Status at Age 3.7 Years. *J Acad Nutr Diet*.  
462 2016;116(4):630-7.
- 463 17. Carruth BR, Skinner JD. Revisiting the picky eater phenomenon: neophobic behaviors of  
464 young children. *J Am Coll Nutr*. 2000;19(6):771-80.

- 465 18. Taylor CM, Steer CD, Hays NP, Emmett PM. Growth and body composition in children who  
466 are picky eaters: a longitudinal view. *Eur J Clin Nutr.* 2018.
- 467 19. Boyd A, Golding J, Macleod J, Lawlor DA, Fraser A, Henderson J, et al. Cohort Profile: the  
468 'children of the 90s'--the index offspring of the Avon Longitudinal Study of Parents and Children. *Int J*  
469 *Epidemiol.* 2013;42(1):111-27.
- 470 20. Fraser A, Macdonald-Wallis C, Tilling K, Boyd A, Golding J, Smith GD, et al. Cohort Profile: The  
471 Avon Longitudinal Study of Parents and Children: ALSPAC mothers cohort. *International Journal of*  
472 *Epidemiology.* 2013;42(1):97-110.
- 473 21. Cole TJ, Bellizzi MC, Flegal KM, Dietz WH. Establishing a standard definition for child  
474 overweight and obesity worldwide: international survey. *BMJ.* 2000;320(7244):1240-3.
- 475 22. Clogg C. Latent class models: Recent developments and prospects for the future. In:  
476 Arminger G, Clogg C, Sobel M, editors. *Handbook of statistical modeling for the social and behavioral*  
477 *sciences.* New York, NY: Plenum Press;; 1995. p. 311 - 59.
- 478 23. Berlin KS, Parra GR, Williams NA. An Introduction to Latent Variable Mixture Modeling (Part  
479 2): Longitudinal Latent Class Growth Analysis and Growth Mixture Models. *Journal of pediatric*  
480 *psychology.* 2014;39(2):188-203.
- 481 24. Asparouhov T, Muthen B. Auxiliary Variables in Mixture Modeling: Three-Step Approaches  
482 Using Mplus. *Struct Equ Modeling.* 2014;21(3):329-41.
- 483 25. Goodman LA. On the Assignment of Individuals to Latent Classes. *Sociol Methodol.*  
484 2007;37:1-22.
- 485 26. Muthen LK, Muthen B. *Mplus User's Guide.* Eighth Edition. Los Angeles, CA Muthén &  
486 Muthén; 1997-2017
- 487 27. StataCorp. *Stata Statistical Software: Release 15.* College Station, TX: StataCorp LLC 2017.
- 488 28. Ashcroft J, Semmler C, Carnell S, van Jaarsveld CHM, Wardle J. Continuity and stability of  
489 eating behaviour traits in children. *Eur J Clin Nutr.* 2008;62(8):985-90.
- 490 29. Derks IPM, Bolhuis K, Sijbrands EJG, Gaillard R, Hillegers MHJ, Jansen PW. Predictors and  
491 patterns of eating behaviors across childhood: Results from The Generation R study. *Appetite.*  
492 2019;141:104295.
- 493 30. Northstone K, Emmett P, Nethersole F, Pregnancy ASTALSo, Childhood. The effect of age of  
494 introduction to lumpy solids on foods eaten and reported feeding difficulties at 6 and 15 months. *J*  
495 *Hum Nutr Diet.* 2001;14(1):43-54.
- 496 31. Syrad H, Llewellyn CH, Johnson L, Boniface D, Jebb SA, van Jaarsveld CHM, et al. Meal size is  
497 a critical driver of weight gain in early childhood. *Sci Rep-Uk.* 2016;6.
- 498 32. Huang TT, Howarth NC, Lin BH, Roberts SB, McCrory MA. Energy intake and meal portions:  
499 associations with BMI percentile in U.S. children. *Obes Res.* 2004;12(11):1875-85.
- 500 33. McConahy KL, Smicklas-Wright H, Birch LL, Mitchell DC, Picciano MF. Food portions are  
501 positively related to energy intake and body weight in early childhood. *J Pediatr-U.S.*  
502 2002;140(3):340-7.
- 503 34. Carnell S, Wardle J. Measuring behavioural susceptibility to obesity: validation of the child  
504 eating behaviour questionnaire. *Appetite.* 2007;48(1):104-13.
- 505 35. Syrad H, Johnson L, Wardle J, Llewellyn CH. Appetitive traits and food intake patterns in early  
506 life. *Am J Clin Nutr.* 2016;103(1):231-5.
- 507 36. van Jaarsveld CHM, Boniface D, Llewellyn CH, Wardle J. Appetite and Growth A Longitudinal  
508 Sibling Analysis. *Jama Pediatr.* 2014;168(4):345-50.
- 509 37. Cardona Cano S, Tiemeier H, Van Hoeken D, Tharner A, Jaddoe VW, Hofman A, et al.  
510 Trajectories of picky eating during childhood: A general population study. *The International journal*  
511 *of eating disorders.* 2015;48(6):570-9.
- 512 38. Tharner A, Jansen PW, Kiefte-de Jong JC, Moll HA, van der Ende J, Jaddoe VW, et al. Toward  
513 an operative diagnosis of fussy/picky eating: a latent profile approach in a population-based cohort.  
514 *The international journal of behavioral nutrition and physical activity.* 2014;11:14.

- 515 39. Locke AE, Kahali B, Berndt SI, Justice AE, Pers TH, Felix R, et al. Genetic studies of body mass  
516 index yield new insights for obesity biology. *Nature*. 2015;518(7538):197-U401.
- 517 40. Llewellyn C, Wardle J. Behavioral susceptibility to obesity: Gene-environment interplay in  
518 the development of weight. *Physiology & behavior*. 2015;152(Pt B):494-501.
- 519 41. Llewellyn CH, Trzaskowski M, van Jaarsveld CHM, Plomin R, Wardle J. Satiety mechanisms in  
520 genetic risk of obesity. *Jama Pediatr*. 2014;168(4):338-44.
- 521 42. Konttinen H, Llewellyn C, Wardle J, Silventoinen K, Joensuu A, Mannisto S, et al. Appetitive  
522 traits as behavioural pathways in genetic susceptibility to obesity: a population-based cross-sectional  
523 study. *Sci Rep-Uk*. 2015;5.
- 524 43. de Lauzon-Guillain B, Clifton EA, Day FR, Clement K, Brage S, Forouhi NG, et al. Mediation  
525 and modification of genetic susceptibility to obesity by eating behaviors. *Am J Clin Nutr*.  
526 2017;106(4):996-1004.
- 527 44. Jacob R, Drapeau V, Tremblay A, Provencher V, Bouchard C, Perusse L. The role of eating  
528 behavior traits in mediating genetic susceptibility to obesity. *Am J Clin Nutr*. 2018;108(3):445-52.
- 529 45. Vilela S, Hetherington MM, Oliveira A, Lopes C. Tracking diet variety in childhood and its  
530 association with eating behaviours related to appetite: The generation XXI birth cohort. *Appetite*.  
531 2018;123:241-8.
- 532 46. de Barse LM, Tiemeier H, Leermakers ETM, Voortman T, Jaddoe VVW, Edelson LR, et al.  
533 Longitudinal association between preschool fussy eating and body composition at 6 years of age:  
534 The Generation R Study. *The international journal of behavioral nutrition and physical activity*.  
535 2015;12(153):8.
- 536 47. APA APA. *Diagnostic and Statistical Manual of Mental Disorders (DSM-V)*. Arlington, VA: APA  
537 Press; 2013.
- 538 48. Bryant-Waugh R. *Avoidant restrictive food intake disorder: An illustrative case example*. New  
539 York, N.Y: Wiley; 2013. 1 online resource p.
- 540 49. Fisher MM, Rosen DS, Ornstein RM, Mammel KA, Katzman DK, Rome ES, et al.  
541 Characteristics of avoidant/restrictive food intake disorder in children and adolescents: a "new  
542 disorder" in DSM-5. *J Adolesc Health*. 2014;55(1):49-52.
- 543 50. Smith AD, Herle M, Fildes A, Cooke L, Steinsbekk S, Llewellyn CH. Food fussiness and food  
544 neophobia share a common etiology in early childhood. *J Child Psychol Psyc*. 2017;58(2):189-96.
- 545 51. Ram N, Grimm KJ. Growth Mixture Modeling: A Method for Identifying Differences in  
546 Longitudinal Change Among Unobserved Groups. *Int J Behav Dev*. 2009;33(6):565-76.
- 547 52. Bray BC, Lanza ST, Tan X. Eliminating Bias in Classify-Analyze Approaches for Latent Class  
548 Analysis. *Struct Equ Modeling*. 2015;22(1):1-11.

549

550

551

552

553

554

555

556

557

558

559

**Table 1: Summary statistics of the baseline characteristics of the study population;**

| <b>Baseline characteristics</b>                                  | <b>N available</b> | <b>Mean (SD) or N (%)</b> |
|------------------------------------------------------------------|--------------------|---------------------------|
| <b>Sex (%boys)</b>                                               | 12048              | Boys: 6208 (52)           |
| <b>Gestational age at birth (weeks)</b>                          | 12048              | 39.45 (1.86)              |
| <b>Birthweight (grams)</b>                                       | 11902              | 345 (546)                 |
| <b>Maternal age (years)</b>                                      | 12048              | 28.31 (4.86)              |
| <b>Maternal A-Levels or higher</b>                               | 11375              | 4158 (37)                 |
| <b>Parental non-manual labor profession</b>                      | 9366               | 7558 (81)                 |
| <b>zBMI<sup>a</sup> of children at age 11 (kg/m<sup>2</sup>)</b> | 4885               | 0.60 (1.14)               |

**ALSPAC Study**

560

561

562

563

564

565

566

567

568

569

570

571

572

573

574

575

576

577

**Table 2: Estimated regression coefficients ( $\beta$ ) for assigned eating behavior class on standardized BMI at age 11, separately for boys and girls**

| <b>Overeating</b>                                                                                 |                           |                           |       |                           |               |       |
|---------------------------------------------------------------------------------------------------|---------------------------|---------------------------|-------|---------------------------|---------------|-------|
| <b>Outcome: age and sex adjusted BMI aged 11<sup>1</sup>, adjusted for covariates<sup>2</sup></b> |                           |                           |       |                           |               |       |
|                                                                                                   | <b>Boys</b>               |                           |       | <b>Girls</b>              |               |       |
| <b>N</b>                                                                                          | 2286                      |                           |       | 2596                      |               |       |
| <b>Class</b>                                                                                      | <b><math>\beta</math></b> | <b>95% CI<sup>3</sup></b> |       | <b><math>\beta</math></b> | <b>95% CI</b> |       |
| <b>1</b> low stable                                                                               | base                      |                           |       | Base                      |               |       |
| <b>2</b> low transient                                                                            | 0.26                      | 0.13                      | 0.39  | 0.32                      | 0.19          | 0.44  |
| <b>3</b> late increasing                                                                          | 0.94                      | 0.8                       | 1.09  | 0.94                      | 0.82          | 1.07  |
| <b>4</b> early increasing                                                                         | 0.83                      | 0.65                      | 1.02  | 1.1                       | 0.92          | 1.28  |
| Test for (Sex * Class) interaction $F(3, 4869) = 1.10, p=0.35$                                    |                           |                           |       |                           |               |       |
| <b>Undereating</b>                                                                                |                           |                           |       |                           |               |       |
| <b>Outcome: age and sex adjusted BMI aged 11, adjusted for covariates<sup>2</sup></b>             |                           |                           |       |                           |               |       |
|                                                                                                   | <b>Boys</b>               |                           |       | <b>Girls</b>              |               |       |
| <b>N</b>                                                                                          | 2285                      |                           |       | 2595                      |               |       |
| <b>Class</b>                                                                                      | <b><math>\beta</math></b> | <b>95% CI</b>             |       | <b><math>\beta</math></b> | <b>95% CI</b> |       |
| <b>1</b> low stable                                                                               | base                      |                           |       | base                      |               |       |
| <b>2</b> low transient                                                                            | -0.11                     | -0.24                     | 0.01  | -0.13                     | -0.24         | -0.01 |
| <b>3</b> low decreasing                                                                           | -0.17                     | -0.31                     | -0.03 | -0.19                     | -0.32         | -0.07 |
| <b>4</b> high transient                                                                           | -0.25                     | -0.41                     | -0.08 | -0.24                     | -0.38         | -0.09 |
| <b>5</b> high decreasing                                                                          | -0.27                     | -0.5                      | -0.05 | -0.21                     | -0.45         | 0.03  |
| <b>6</b> high stable                                                                              | -0.79                     | -1.15                     | -0.42 | -0.76                     | -1.06         | -0.45 |
| Test for (Sex * Class) interaction $F(5, 4863) = 0.12, p = 0.98$                                  |                           |                           |       |                           |               |       |
| <b>Fussy Eating</b>                                                                               |                           |                           |       |                           |               |       |
| <b>Outcome: age and sex adjusted BMI aged 11, adjusted for covariates<sup>2</sup></b>             |                           |                           |       |                           |               |       |
|                                                                                                   | <b>Boys</b>               |                           |       | <b>Girls</b>              |               |       |
| <b>N</b>                                                                                          | 2287                      |                           |       | 2597                      |               |       |
| <b>Class</b>                                                                                      | <b><math>\beta</math></b> | <b>95% CI</b>             |       | <b><math>\beta</math></b> | <b>95% CI</b> |       |
| <b>1</b> low stable                                                                               | base                      |                           |       | base                      |               |       |
| <b>2</b> low transient                                                                            | -0.21                     | -0.36                     | -0.05 | 0.01                      | -0.13         | 0.15  |
| <b>3</b> low increasing                                                                           | -0.25                     | -0.39                     | -0.11 | -0.01                     | -0.13         | 0.11  |
| <b>4</b> high decreasing                                                                          | -0.31                     | -0.48                     | -0.15 | -0.31                     | -0.45         | -0.17 |
| <b>5</b> low increasing                                                                           | -0.34                     | -0.50                     | -0.17 | -0.26                     | -0.41         | -0.11 |
| <b>6</b> high stable                                                                              | -0.49                     | -0.68                     | -0.30 | -0.35                     | -0.52         | -0.18 |

Test for (Sex \* Class) F (5, 4867) = 2.01, p = 0.07  
interaction

---

<sup>1</sup> Age and sex standardized score in reference to the UK population (21)

<sup>2</sup> Estimates adjusted for: maternal age at birth, gestational age, birthweight and maternal education <sup>3</sup> CI: Confidence Intervals

578

579

580

581

582

583

584

585

586

587

588

589

590

591

592

593

594

595

596

597

598

599

600

601

602

603





605 **Figure 1: Prevalence of eating behaviours across the eight assessment waves**

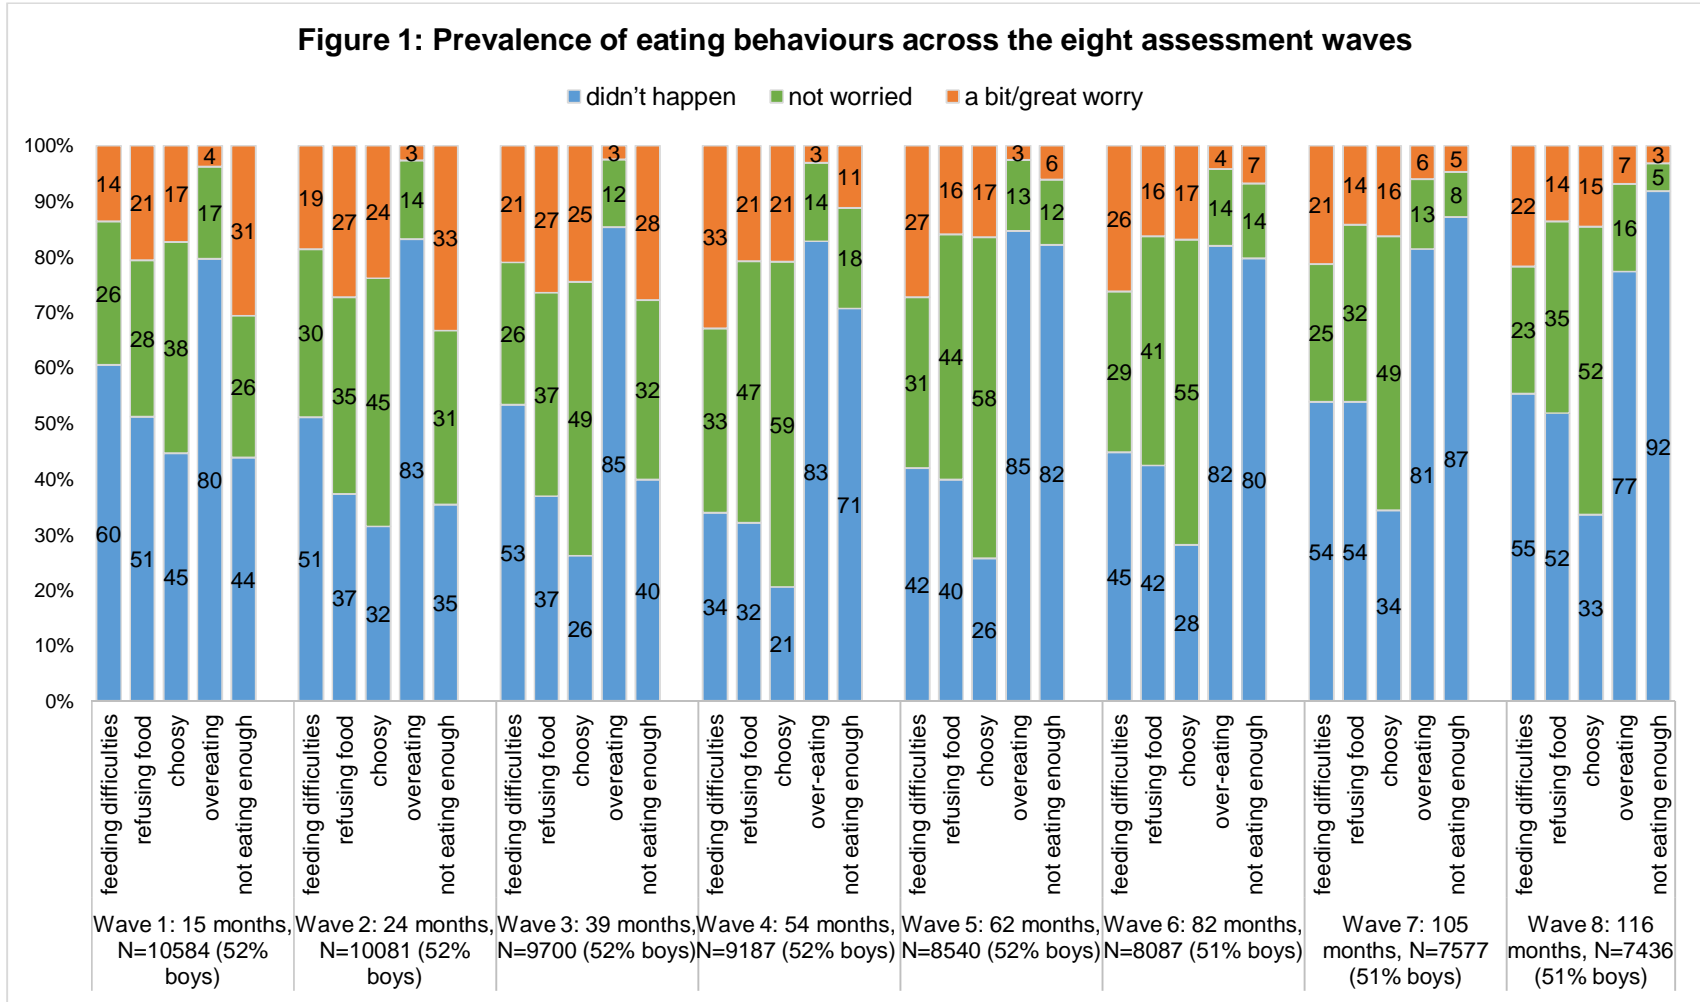

606

607 **Figure 2a: Trajectories of parental reports of overeating behaviors from 15 to**  
608 **116 months for boys and girls (6186 boys, 5817 girls)**

609 **Caption:** The y-axis shows the probability of scoring in the highest category of overeating (“great  
610 worry”) at each of the eight time points. Trajectories for boys are in dashed lines. Trajectories for girls  
611 are in solid lines. The legend shows the name of the class for boys (Bs) and girls (Gs), followed by  
612 their percentages in brackets.

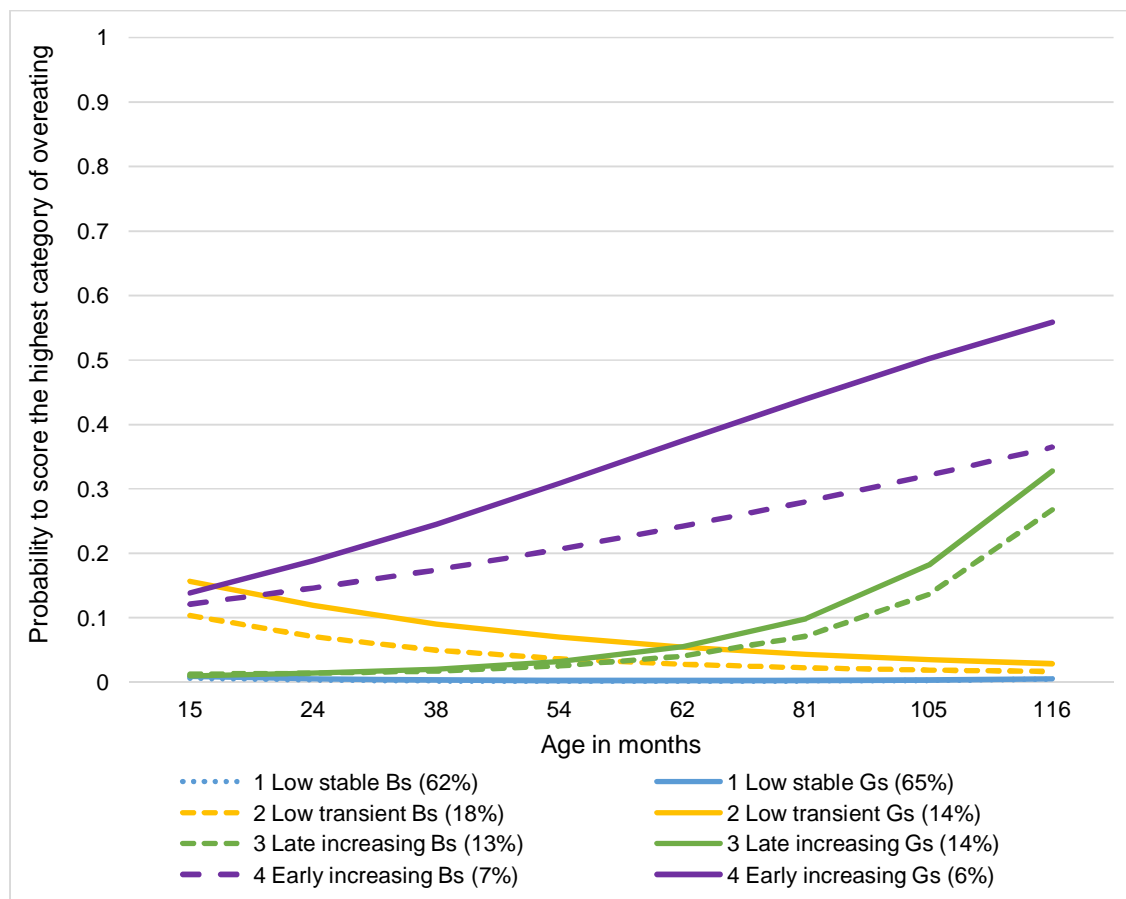

613

614

615

616

617

618

619

620 **Figures 2b: Trajectories of parental reports of undereating behaviors from 15**  
621 **to 116 months for boys and girls (6189 boys, 5817 girls)**

622 **Caption:** The y-axis shows the probability of scoring in the highest category of undereating (“a bit  
623 worried”) at each of the eight time points. Trajectories for boys are in dashed lines. Trajectories for  
624 girls are in solid lines. The legend shows the name of the class for boys (Bs) and girls (Gs), followed  
625 by their percentages in brackets.

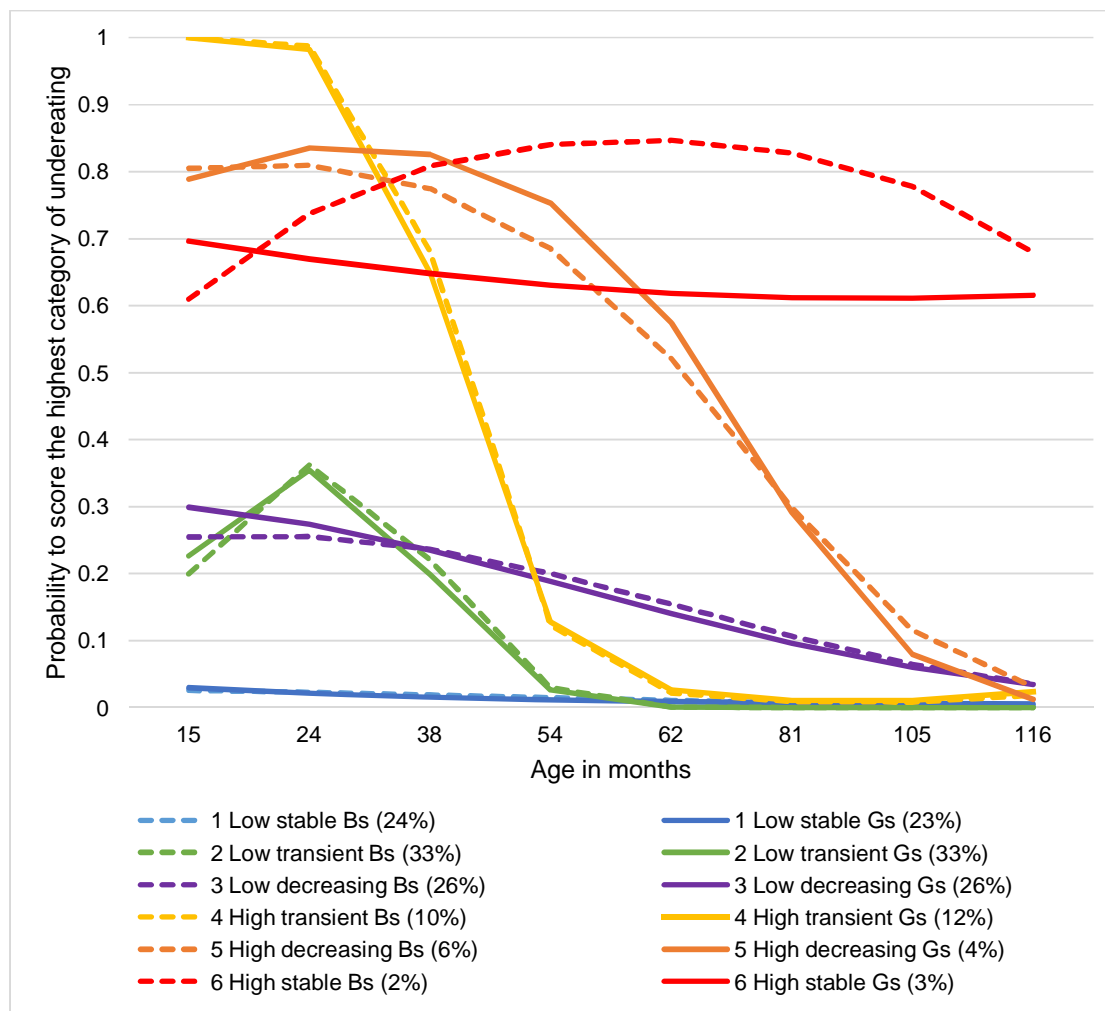

626

627

628

629

630

631

632

633

634

635 **Figures 2c: Trajectories of parental reports of fussy eating behaviors from 15**  
636 **to 116 months for boys and girls (6208 boys, 5840 girls)**

637 **Caption:** The y-axis shows the probability of scoring in the highest category of the fussy eating items  
638 (“a bit worried”) at each of the eight time points. Trajectories for boys are in dashed lines. Trajectories  
639 for girls are in solid lines. The legend shows the name of the class for boys (Bs) and girls (Gs),  
640 followed by their percentages in brackets.

641

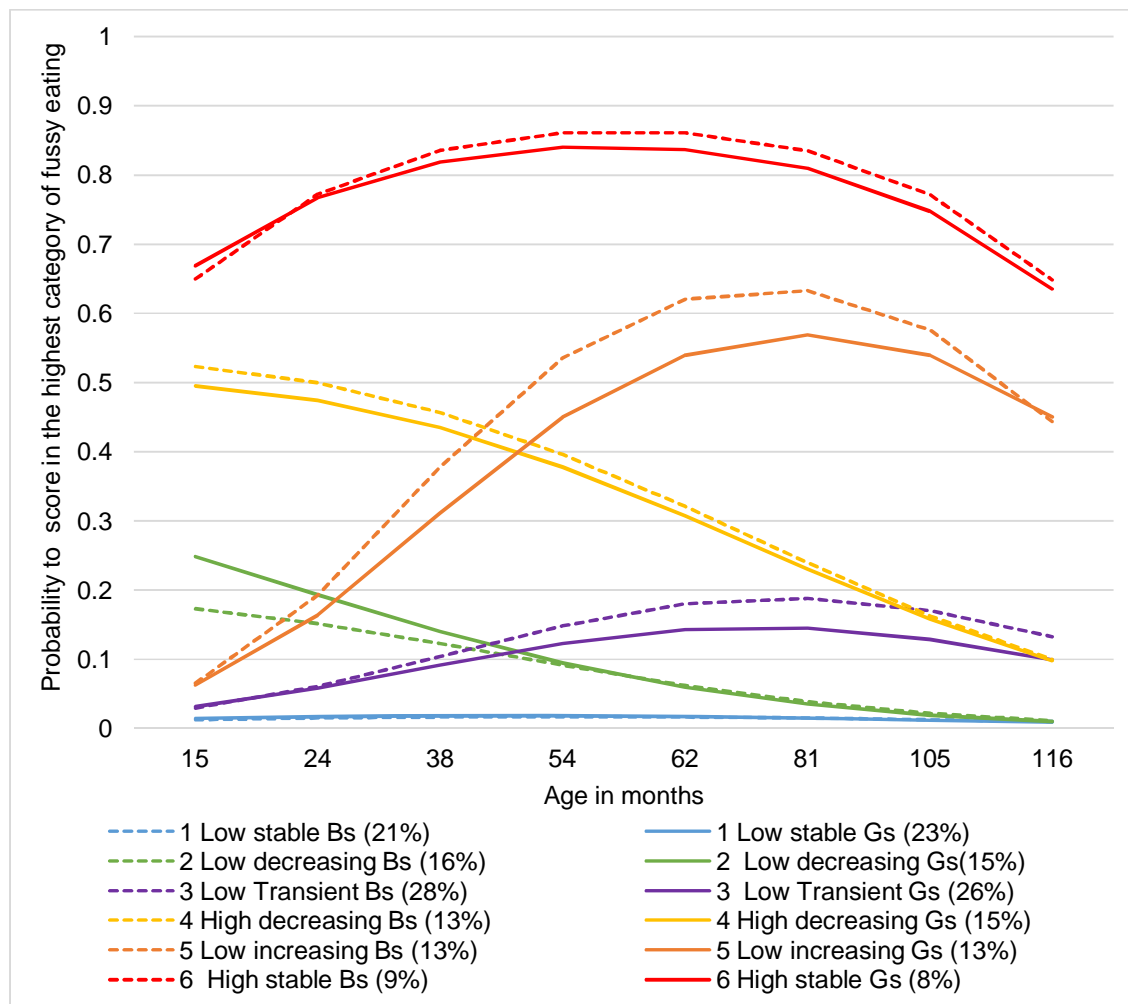

642

643

644

645

646

647

648

649
